# Supplementary material for: N-Heterocyclic carbene and cyclic (alkyl)(amino)carbene ligated half-sandwich complexes of chromium(ii) and chromium(i)
Source: Royal Society of Chemistry journal article supplement (doi:10.1039/d3dt02123h), 2023-01-01
Supplement: d3dt02123h1.pdf [file d3dt02123h1.pdf]

Electronic Supplementary Information for:

## N-Heterocyclic Carbene and Cyclic (Alkyl)(amino)carbene ligated Half-sandwich Complexes of Chromium(I) and Chromium(II)

Günther Horrer<sup>[a]</sup>, Martin S. Luff<sup>[a]</sup> and Udo Radius<sup>[a]\*</sup>

<sup>[a]</sup>Institut für Anorganische Chemie, Julius-Maximilians-Universität Würzburg, Am Hubland, 97074 Würzburg, Germany.

### Table of Contents:

|                                                                                                                       |    |
|-----------------------------------------------------------------------------------------------------------------------|----|
| 1. Crystallographic Details .....                                                                                     | 2  |
| 2. Molecular Structures of Compounds 1 – 13 and of [Cr(IMe <sup>Me</sup> )(THF)Cl <sub>2</sub> ] .....                | 8  |
| 3. High Resolution Mass Spectrometry Data .....                                                                       | 14 |
| 4. IR-Spectrum of [(η <sup>5</sup> -C <sub>5</sub> Me <sub>5</sub> )Cr(IMe <sup>Me</sup> )(CO) <sub>2</sub> ] 13..... | 19 |
| 5. UV-Vis Spectra of Compounds .....                                                                                  | 20 |
| 5. Computational Details – Optimized Geometries .....                                                                 | 22 |
| 6. References .....                                                                                                   | 25 |

## 1. Crystallographic Details

### General Informations

Crystals suitable for single crystal X-Ray diffraction analysis were immersed in a film of perfluoropolyether oil mounted on a custom-made polyimide microloop and transferred to a low temperature stream of nitrogen at 100 K.

The data were collected on a Rigaku Oxford Diffraction XtaLAB Synergy-DW diffractometer with a HyPix-6000HE detector and monochromated Cu-K $\alpha$  or Mo-K $\alpha$  radiation equipped with an Oxford Cryo 800 cooling unit. The data were collected at 100 K. The images were processed, corrected for Lorentz-polarization effects and absorption with the implemented CrysAlisPro software packages from Rigaku Oxford Diffraction. The structures were solved using Fourier expansion technique and the intrinsic phasing method provided by SHELXT<sup>[1]</sup>. All non-hydrogen atoms were refined anisotropically and hydrogen atoms were usually assigned to idealized 'riding' positions by full-matrix least squares against F2 of all data and were included in structure factors calculations. The Diamond software package was used for graphical visualization of the structures.<sup>[2]</sup> Full structural information as also been deposited at Cambridge Crystallographic Data Centre (CCDC-Numbers see Tables S1 – S5).

## Experimental Crystal Data Collection Parameter

**Table S1** Crystallographic data of compounds **1-3**.

|                                                           | $[\{\text{Cr}(\text{iPr}^{\text{Me}})(\text{THF})\text{Cl}(\mu\text{-Cl})\}_2]$ <b>1</b> | $[\{\text{Cr}(\text{cAAC}^{\text{Me}})\text{Cl}(\mu\text{-Cl})\}_2]$ <b>2</b> | $[\text{CpCr}(\text{IMe}^{\text{Me}})\text{Cl}]$ <b>3</b>              |
|-----------------------------------------------------------|------------------------------------------------------------------------------------------|-------------------------------------------------------------------------------|------------------------------------------------------------------------|
| Chemical formula                                          | $\text{C}_{30}\text{H}_{56}\text{Cl}_4\text{Cr}_2\text{N}_4\text{O}_2$                   | $\text{C}_{40}\text{H}_{62}\text{Cl}_4\text{Cr}_2\text{N}_2$                  | $\text{C}_{12}\text{H}_{17}\text{ClCrN}_2$                             |
| Formula Mass [ $\text{g}\cdot\text{mol}^{-1}$ ]           | 750.58                                                                                   | 816.71                                                                        | 276.72                                                                 |
| Temperature [K]                                           | 100(2)                                                                                   | 100(2)                                                                        | 100(2)                                                                 |
| Wavelength [ $\text{\AA}$ ]                               | 1.54184                                                                                  | 1.54184                                                                       | 1.54184                                                                |
| Crystal system                                            | triclinic                                                                                | monoclinic                                                                    | monoclinic                                                             |
| Space group                                               | P-1                                                                                      | $\text{P2}_1/\text{c}$                                                        | $\text{P2}_1/\text{c}$                                                 |
| $a$ [ $\text{\AA}$ ]                                      | 9.7853(2)                                                                                | 10.41860(10)                                                                  | 9.76230(10)                                                            |
| $b$ [ $\text{\AA}$ ]                                      | 9.8595(2)                                                                                | 9.81210(10)                                                                   | 19.7090(2)                                                             |
| $c$ [ $\text{\AA}$ ]                                      | 10.5749(2)                                                                               | 20.0881(2)                                                                    | 13.40020(10)                                                           |
| $\alpha$ [ $^\circ$ ]                                     | 104.3170(10)                                                                             | 90                                                                            | 90                                                                     |
| $\beta$ [ $^\circ$ ]                                      | 108.8080(10)                                                                             | 90.9570(10) $^\circ$                                                          | 98.2380(10)                                                            |
| $\gamma$ [ $^\circ$ ]                                     | 100.6240(10)                                                                             | 90                                                                            | 90                                                                     |
| Unit cell volume [ $\text{\AA}^3$ ]                       | 896.15(3)                                                                                | 2053.29(4)                                                                    | 2551.66(4)                                                             |
| No. of formula units per unit cell                        | 1                                                                                        | 2                                                                             | 8                                                                      |
| Density (calc) [ $\text{g}\cdot\text{cm}^{-3}$ ]          | 1.391                                                                                    | 1.321                                                                         | 1.441                                                                  |
| Absorption coefficient [ $\text{mm}^{-1}$ ]               | 7.989                                                                                    | 6.969                                                                         | 9.085                                                                  |
| $F(000)$                                                  | 396                                                                                      | 864                                                                           | 1152                                                                   |
| Theta range $\vartheta$ [ $^\circ$ ]                      | 4.679 to 74.473                                                                          | 4.244 to 77.600                                                               | 4.018 to 72.125                                                        |
| $hkl$                                                     | -11 $\leq h \leq$ 12,<br>-12 $\leq k \leq$ 12,<br>-13 $\leq l \leq$ 13                   | -12 $\leq h \leq$ 13,<br>-12 $\leq k \leq$ 10,<br>-23 $\leq l \leq$ 25        | -11 $\leq h \leq$ 12,<br>-24 $\leq k \leq$ 24,<br>-15 $\leq l \leq$ 16 |
| Reflections collected                                     | 18361                                                                                    | 21657                                                                         | 26247                                                                  |
| Independent reflections                                   | 3651                                                                                     | 4304                                                                          | 5019                                                                   |
| Completeness to theta [%]                                 | 99.9                                                                                     | 100                                                                           | 100                                                                    |
| $R_{\text{int}}$                                          | 0.0420                                                                                   | 0.0523                                                                        | 0.0340                                                                 |
| Data                                                      | 3651                                                                                     | 4304                                                                          | 5019                                                                   |
| Restraints                                                | 0                                                                                        | 0                                                                             | 0                                                                      |
| Parameter                                                 | 196                                                                                      | 225                                                                           | 297                                                                    |
| $R1$ and $wR2$ for $[I > 2\sigma(I)]$                     | 0.0317, 0.0873                                                                           | 0.0432, 0.1185                                                                | 0.0400, 0.1029                                                         |
| $R1$ and $wR2$ (all data)                                 | 0.0323, 0.0878                                                                           | 0.0456, 0.1204                                                                | 0.0420, 0.1041                                                         |
| Largest diff. peak and hole [ $\text{e}\text{\AA}^{-3}$ ] | 0.469 / -0.745                                                                           | 0.765 / -0.825                                                                | 1.409 / -565                                                           |
| Goof                                                      | 1.049                                                                                    | 1.062                                                                         | 1.073                                                                  |
| CCDC number                                               | 2279734                                                                                  | 2279739                                                                       | 2279747                                                                |

**Table S2** Crystallographic data of compounds **4 -6**.

|                                                                      | [CpCr( <i>i</i> Pr <sup>Me</sup> )Cl] <b>4</b>                      | [CpCr(IMes)Cl] <b>5</b>                                             | [CpCr(IDipp)Cl] <b>6</b>                                            |
|----------------------------------------------------------------------|---------------------------------------------------------------------|---------------------------------------------------------------------|---------------------------------------------------------------------|
| Chemical formula                                                     | C <sub>16</sub> H <sub>25</sub> ClCrN <sub>2</sub>                  | C <sub>26</sub> H <sub>29</sub> ClCrN <sub>2</sub>                  | C <sub>44</sub> H <sub>53</sub> ClCrN <sub>2</sub>                  |
| Formula Mass [g·mol <sup>-1</sup> ]                                  | 332.83                                                              | 456.96                                                              | 697.33                                                              |
| Temperature [K]                                                      | 100(2)                                                              | 100(2)                                                              | 100.00(10)                                                          |
| Wavelength [Å]                                                       | 1.54184                                                             | 1.54184                                                             | 1.54184                                                             |
| Crystal system                                                       | orthorhombic                                                        | monoclinic                                                          | monoclinic                                                          |
| Space group                                                          | Pbca                                                                | C2/c                                                                | P2 <sub>1</sub> /c                                                  |
| <i>a</i> [Å]                                                         | 9.7164(2)                                                           | 32.9527(2)                                                          | 12.78010(10)                                                        |
| <i>b</i> [Å]                                                         | 13.4856(2)                                                          | 8.58380(10)                                                         | 21.8107(2)                                                          |
| <i>c</i> [Å]                                                         | 26.2318(4)                                                          | 33.4485(2)                                                          | 14.6278(2)                                                          |
| $\alpha$ [°]                                                         | 90                                                                  | 90                                                                  | 90                                                                  |
| $\beta$ [°]                                                          | 90                                                                  | 92.0050(10)                                                         | 102.9610(10)                                                        |
| $\gamma$ [°]                                                         | 90                                                                  | 90                                                                  | 90                                                                  |
| Unit cell volume [Å <sup>3</sup> ]                                   | 3437.19(10)                                                         | 9455.43(14)                                                         | 3973.52(7)                                                          |
| No. of formula units per unit cell                                   | 8                                                                   | 16                                                                  | 4                                                                   |
| Density (calc) [g·cm <sup>-3</sup> ]                                 | 1.286                                                               | 1.284                                                               | 1.166                                                               |
| Absorption coefficient [mm <sup>-1</sup> ]                           | 6.829                                                               | 5.117                                                               | 3.209                                                               |
| <i>F</i> (000)                                                       | 1408                                                                | 3840                                                                | 1488                                                                |
| Theta range $\vartheta$ [°]                                          | 3.370 to 72.102                                                     | 2.644 to 72.128                                                     | 3.549 to 72.128°.                                                   |
| <i>hkl</i>                                                           | -11<= <i>h</i> <=11,<br>-16<= <i>k</i> <=16,<br>-12<= <i>l</i> <=32 | -40<= <i>h</i> <=40,<br>-10<= <i>k</i> <=10,<br>-29<= <i>l</i> <=41 | -15<= <i>h</i> <=15,<br>-26<= <i>k</i> <=24,<br>-18<= <i>l</i> <=17 |
| Reflections collected                                                | 18250                                                               | 48886                                                               | 41187                                                               |
| Independent reflections                                              | 3382                                                                | 9231                                                                | 7815                                                                |
| Completeness to theta [%]                                            | 99.9                                                                | 99.1                                                                | 99.9                                                                |
| <i>R</i> <sub>int</sub>                                              | 0.0397                                                              | 0.0329                                                              | 0.0315                                                              |
| Data                                                                 | 3382                                                                | 9231                                                                | 7815                                                                |
| Restraints                                                           | 120                                                                 | 0                                                                   | 0                                                                   |
| Parameter                                                            | 233                                                                 | 533                                                                 | 441                                                                 |
| <i>R</i> 1 and <i>wR</i> 2 for [ <i>I</i> > 2 $\sigma$ ( <i>I</i> )] | 0.0371, 0.0903                                                      | 0.0373, 0.0992                                                      | 0.0341, 0.0888                                                      |
| <i>R</i> 1 and <i>wR</i> 2 (all data)                                | 0.0408, 0.0924                                                      | 0.0403, 0.1009                                                      | 0.0395, 0.0919                                                      |
| Largest diff. peak and hole [eÅ <sup>-3</sup> ]                      | 0.564 / -0.377                                                      | 0.371 / -0.467                                                      | 0.261 / -0.422                                                      |
| GooF                                                                 | 1.051                                                               | 1.080                                                               | 1.070                                                               |
| CCDC number                                                          | 2279743                                                             | 2279746                                                             | 2279741                                                             |

**Table S3** Crystallographic data of compounds **7-9**.

|                                                             | [CpCr(cAAC <sup>Me</sup> )Cl] <b>7</b>   | [Cp*Cr(IME <sup>Me</sup> )Cl] <b>8</b>             | [FICr(cAAC <sup>Me</sup> )Cl] <b>9</b> |
|-------------------------------------------------------------|------------------------------------------|----------------------------------------------------|----------------------------------------|
| Chemical formula                                            | C <sub>25</sub> H <sub>36</sub> ClCrN    | C <sub>17</sub> H <sub>27</sub> ClCrN <sub>2</sub> | C <sub>40</sub> H <sub>48</sub> ClCrN  |
| Formula Mass [g·mol <sup>-1</sup> ]                         | 438.00                                   | 488.05                                             | 630.24                                 |
| Temperature [K]                                             | 100.00(10)                               | 100(2)                                             | 100(2)                                 |
| Wavelength [Å]                                              | 1.54184                                  | 1.54184                                            | 1.54184                                |
| Crystal system                                              | tetragonal                               | monoclinic                                         | trigonal                               |
| Space group                                                 | P4 <sub>1</sub>                          | P2 <sub>1</sub> /c                                 | P                                      |
| <i>a</i> [Å]                                                | 10.70621(4)                              | 8.3556(2)                                          | 23.8746(4)                             |
| <i>b</i> [Å]                                                | 10.70621(4)                              | 15.6072(4)                                         | 23.8746(4)                             |
| <i>c</i> [Å]                                                | 20.09860(10)                             | 27.4722(6)                                         | 10.3635(2)                             |
| $\alpha$ [°]                                                | 90                                       | 90                                                 | 90                                     |
| $\beta$ [°]                                                 | 90                                       | 91.100(2)°.                                        | 90                                     |
| $\gamma$ [°]                                                | 90                                       | 90                                                 | 120                                    |
| Unit cell volume [Å <sup>3</sup> ]                          | 2303.76(2)                               | 3581.92(15)                                        | 5115.7(2)                              |
| No. of formula units per unit cell                          | 4                                        | 8                                                  | 6                                      |
| Density (calc) [g·cm <sup>-3</sup> ]                        | 1.263                                    | 1.286                                              | 1.227                                  |
| Absorption coefficient [mm <sup>-1</sup> ]                  | 5.206                                    | 6.573                                              | 3.676                                  |
| <i>F</i> (000)                                              | 936                                      | 1472                                               | 2016                                   |
| Theta range $\vartheta$ [°]                                 | 4.129 to 80.341                          | 3.218 to 66.997                                    | 3.703 to 72.091                        |
| hkl                                                         | -13<=h<=13,<br>-13<=k<=13,<br>-25<=l<=25 | -8<=h<=9,<br>-18<=k<=18,<br>-32<=l<=32             | -29<=h<=29,<br>-29<=k<=29,<br>0<=l<=12 |
| Reflections collected                                       | 48084                                    | 32738                                              | 38450                                  |
| Independent reflections                                     | 4990                                     | 6366                                               | 6687                                   |
| Completeness to theta [%]                                   | 100                                      | 99.7                                               | 99.8                                   |
| <i>R</i> <sub>int</sub>                                     | 0.0512                                   | 0.1037                                             | 0.0578                                 |
| Data                                                        | 4990                                     | 6366                                               | 6688                                   |
| Restraints                                                  | 215                                      | 0                                                  | 318                                    |
| Parameter                                                   | 307                                      | 397                                                | 456                                    |
| <i>R</i> 1 and <i>wR</i> 2 for [ <i>I</i> > 2σ( <i>I</i> )] | 0.0374, 0.0992                           | 0.0708, 0.1855                                     | 0.0585, 0.1306                         |
| <i>R</i> 1 and <i>wR</i> 2 (all data)                       | 0.0379, 0.0995                           | 0.0758/ 0.1900                                     | 0.0797, 0.1375                         |
| Largest diff. peak and hole [eÅ <sup>-3</sup> ]             | 0.281 / -0.512                           | 1.230 / -1.354                                     | 0.395 / -0.416                         |
| GooF                                                        | 1.109                                    | 1.040                                              | 1.156                                  |
| CCDC number                                                 | 2279737                                  | 2279744                                            | 2279735                                |

**Table S4** Crystallographic data of compounds **10** - **12**.

|                                                             | [IndCr(cAAC <sup>Me</sup> )Cl] <b>10</b>                            | [CpCr(cAAC <sup>Me</sup> )(NPh <sub>2</sub> )] <b>11</b>            | [CpCr(IME <sup>Me</sup> )(η <sup>3</sup> -C <sub>3</sub> H <sub>5</sub> )] <b>12</b> |
|-------------------------------------------------------------|---------------------------------------------------------------------|---------------------------------------------------------------------|--------------------------------------------------------------------------------------|
| Chemical formula                                            | C <sub>29</sub> H <sub>38</sub> ClCrN                               | C <sub>37</sub> H <sub>46</sub> CrN <sub>2</sub>                    | C <sub>15</sub> H <sub>22</sub> CrN <sub>2</sub>                                     |
| Formula Mass [g·mol <sup>-1</sup> ]                         | 488.05                                                              | 570.76                                                              | 282.34                                                                               |
| Temperature [K]                                             | 100(2)                                                              | 100.00(10)                                                          | 100(2)                                                                               |
| Wavelength [Å]                                              | 1.54184                                                             | 1.54184                                                             | 1.54184                                                                              |
| Crystal system                                              | monoclinic                                                          | triclinic                                                           | monoclinic                                                                           |
| Space group                                                 | P2 <sub>1</sub> /n                                                  | P                                                                   | P2 <sub>1</sub> /c                                                                   |
| <i>a</i> [Å]                                                | 10.77400(10)                                                        | 9.9514(2)                                                           | 12.67350(10)                                                                         |
| <i>b</i> [Å]                                                | 14.56590(10)                                                        | 10.4567(2)                                                          | 10.56340(10)                                                                         |
| <i>c</i> [Å]                                                | 17.1932(2)                                                          | 16.9742(2)                                                          | 21.8451(2)                                                                           |
| $\alpha$ [°]                                                | 90                                                                  | 100.5140(10).                                                       | 90.                                                                                  |
| $\beta$ [°]                                                 | 107.7990(10)                                                        | 96.1890(10)                                                         | 101.5660(10)                                                                         |
| $\gamma$ [°]                                                | 90                                                                  | 111.365(2)                                                          | 90                                                                                   |
| Unit cell volume [Å <sup>3</sup> ]                          | 2569.03(4)                                                          | 1587.74(5)                                                          | 2865.13(5)                                                                           |
| No. of formula units per unit cell                          | 4                                                                   | 2                                                                   | 8                                                                                    |
| Density (calc) [g·cm <sup>-3</sup> ]                        | 1.262                                                               | 1.194                                                               | 1.309                                                                                |
| Absorption coefficient [mm <sup>-1</sup> ]                  | 4.725                                                               | 3.149                                                               | 6.425                                                                                |
| <i>F</i> (000)                                              | 1040                                                                | 612                                                                 | 1200                                                                                 |
| Theta range $\vartheta$ [°]                                 | 4.062 to 67.080                                                     | 2.697 to 72.129.                                                    | 3.560 to 77.759.                                                                     |
| <i>hkl</i>                                                  | -12<= <i>h</i> <=11,<br>-17<= <i>k</i> <=13,<br>-20<= <i>l</i> <=19 | -11<= <i>h</i> <=12,<br>-12<= <i>k</i> <=12,<br>-20<= <i>l</i> <=20 | -16<= <i>h</i> <=13,<br>-12<= <i>k</i> <=13,<br>-27<= <i>l</i> <=27                  |
| Reflections collected                                       | 17093                                                               | 32289                                                               | 28895                                                                                |
| Independent reflections                                     | 4449                                                                | 6246                                                                | 5981                                                                                 |
| Completeness to theta [%]                                   | 96.9                                                                | 99.9                                                                | 99.8                                                                                 |
| <i>R</i> <sub>int</sub>                                     | 0.0241                                                              | 0.0313                                                              | 0.0403                                                                               |
| Data                                                        | 4449                                                                | 6246                                                                | 5981                                                                                 |
| Restraints                                                  | 0                                                                   | 0                                                                   | 0                                                                                    |
| Parameter                                                   | 297                                                                 | 369                                                                 | 333                                                                                  |
| <i>R</i> 1 and <i>wR</i> 2 for [ <i>I</i> > 2σ( <i>I</i> )] | 0.0281, 0.0728                                                      | 0.0325, 0.0794                                                      | 0.0361, 0.0927                                                                       |
| <i>R</i> 1 and <i>wR</i> 2 (all data)                       | 0.0306 / 0.0739                                                     | 0.0340, 0.0802                                                      | 0.0407, 0.0958                                                                       |
| Largest diff. peak and hole [eÅ <sup>-3</sup> ]             | 0.277 / -0.299                                                      | 0.364/ -0.374                                                       | 0.392/ -0.437                                                                        |
| Goof                                                        | 1.067                                                               | 1.061                                                               | 1.051                                                                                |
| CCDC number                                                 | 2279745                                                             | 2279742                                                             | 2279736                                                                              |

**Table S5** Crystallographic data of compounds **13** and **14**.

|                                                             | [Cp*Cr(IMe <sup>Me</sup> )(CO) <sub>2</sub> ] <b>13</b>             | [Cr(IMe <sup>Me</sup> )(THF)Cl <sub>2</sub> ]                                                  |
|-------------------------------------------------------------|---------------------------------------------------------------------|------------------------------------------------------------------------------------------------|
| Chemical formula                                            | C <sub>19</sub> H <sub>27</sub> CrN <sub>2</sub> O <sub>2</sub>     | C <sub>52</sub> H <sub>96</sub> Cr <sub>5</sub> N <sub>8</sub> O <sub>6</sub> Cl <sub>10</sub> |
| Formula Mass [g·mol <sup>-1</sup> ]                         | 367.42                                                              | 1543.86                                                                                        |
| Temperature [K]                                             | 100(2)                                                              | 100(2)                                                                                         |
| Wavelength [Å]                                              | 1.54184                                                             | 1.54184                                                                                        |
| Crystal system                                              | monoclinic                                                          | triclinic                                                                                      |
| Space group                                                 | P2 <sub>1</sub> /c                                                  | P -1                                                                                           |
| <i>a</i> [Å]                                                | 16.8832(2)                                                          | 9.44530(10)                                                                                    |
| <i>b</i> [Å]                                                | 8.39770(10)                                                         | 11.66530(10)                                                                                   |
| <i>c</i> [Å]                                                | 14.6843(2)                                                          | 16.9234(2)                                                                                     |
| $\alpha$ [°]                                                | 90                                                                  | 108.0530(10)                                                                                   |
| $\beta$ [°]                                                 | 114.2490(10)                                                        | 90.2920(10)                                                                                    |
| $\gamma$ [°]                                                | 90                                                                  | 98.8250(10)                                                                                    |
| Unit cell volume [Å <sup>3</sup> ]                          | 1898.25(4)                                                          | 1749.12(3)                                                                                     |
| No. of formula units per unit cell                          | 4                                                                   | 1                                                                                              |
| Density (calc) [g·cm <sup>-3</sup> ]                        | 1.286                                                               | 1.466                                                                                          |
| Absorption coefficient [mm <sup>-1</sup> ]                  | 5.053                                                               | 10.111                                                                                         |
| <i>F</i> (000)                                              | 780                                                                 | 802                                                                                            |
| Theta range $\vartheta$ [°]                                 | 2.871 to 67.037                                                     | 2.751 to 77.708                                                                                |
| <i>hkl</i>                                                  | -20 ≤ <i>h</i> ≤ 20,<br>-10 ≤ <i>k</i> ≤ 10,<br>-17 ≤ <i>l</i> ≤ 16 | -11 ≤ <i>h</i> ≤ 11,<br>-14 ≤ <i>k</i> ≤ 15,<br>-20 ≤ <i>l</i> ≤ 21                            |
| Reflections collected                                       | 32635                                                               | 35798                                                                                          |
| Independent reflections                                     | 3388                                                                | 7330                                                                                           |
| Completeness to theta [%]                                   | 100                                                                 | 99.9                                                                                           |
| <i>R</i> <sub>int</sub>                                     | 0.0366                                                              | 0.0358                                                                                         |
| Data                                                        | 3388                                                                | 7330                                                                                           |
| Restraints                                                  | 0                                                                   | 49                                                                                             |
| Parameter                                                   | 226                                                                 | 343                                                                                            |
| <i>R</i> 1 and <i>wR</i> 2 for [ <i>I</i> > 2σ( <i>I</i> )] | 0.0267, 0.0652                                                      | 0.0550, 0.1378                                                                                 |
| <i>R</i> 1 and <i>wR</i> 2 (all data)                       | 0.0276, 0.0657                                                      | 0.00550, 0.01394                                                                               |
| Largest diff. peak and hole [eÅ <sup>-3</sup> ]             | 0.245 / -0.282                                                      | 1.395 / -1.396                                                                                 |
| GooF                                                        | 1.062                                                               | 1.056                                                                                          |
| CCDC number                                                 | 2279738                                                             | 2279740                                                                                        |

## 2. Molecular Structures of Compounds 1 – 13 and of $[\text{Cr}(\text{IMe}^{\text{Me}})(\text{THF})\text{Cl}_2]$

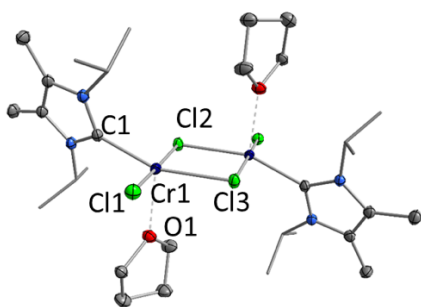

**Figure S1:** The molecular structure of  $[\{\text{Cr}(\text{liPr}^{\text{Me}})(\text{THF})\text{Cl}(\mu\text{-Cl})\}_2]$  **1** in the solid state. Hydrogen atoms are omitted for clarity. Atomic displacement ellipsoids are set at 50 % probability. Selected bond lengths [Å] and angles [°] for **1**: Cr–C1 2.1396(16), Cr–Cl1 2.3505(5), Cr–Cl2 2.4161(5), Cr–Cl3 2.4601(4), Cr1–O1 2.3237(11), C1–Cr–Cl1 93.51(4), C1–Cr–Cl2 87.21(4), C1–Cr–Cl3 159.30(4), C1–Cr–O1 108.89(5), Cl1–Cr–Cl2 174.239(16), Cl1–Cr–Cl3 93.637(14), Cl1–Cr–O1 92.49(3), O1–Cr1–Cl2 92.68(3), O1–Cr1–Cl3 90.17(3).

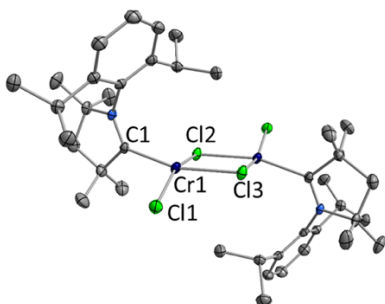

**Figure S2:** The molecular structure of  $[\{\text{Cr}(\text{cAAC}^{\text{Me}})\text{Cl}(\mu\text{-Cl})\}_2]$  **2** in the solid state. Hydrogen atoms are omitted for clarity. Atomic displacement ellipsoids are set at 50 % probability. Selected bond lengths [Å] and angles [°] for **2**: Cr–C1 2.1311(20), Cr–Cl1 2.2992(7), Cr–Cl2 2.3951(7), Cr–Cl3 2.4155(7), C1–Cr–Cl1 100.39(6), C1–Cr–Cl2 87.09(6), C1–Cr–Cl3 163.31(6), Cl1–Cr–Cl2 159.28(3), Cl1–Cr–Cl3 92.29(2).

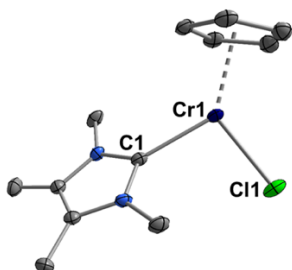

**Figure S3:** The molecular structure of  $[(\eta^5\text{-C}_5\text{H}_5)\text{Cr}(\text{IMe})\text{Cl}]$  **3** in the solid state. Hydrogen atoms are omitted for clarity. Atomic displacement ellipsoids are set at 50 % probability. Selected bond lengths [Å] and angles [°] for **3**: Cr1–C1 2.1213(24), Cr1–Cl1 2.3309(7), Cr–Cp<sub>Centroid</sub> 1.9869(4), C1–Cr1–Cl1 100.16(6), C1–Cr1–Cp<sub>Centroid</sub> 130.239(65), Cl1–Cr1–Cp<sub>Centroid</sub> 129.507(23).



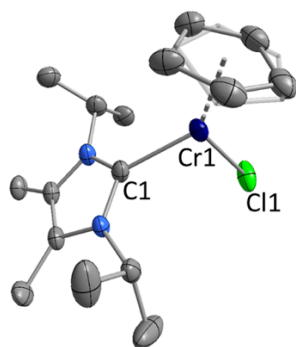

**Figure S4:** The molecular structure of  $[(\eta^5\text{-C}_5\text{H}_5)\text{Cr}(\text{IiPr}^{\text{Me}})\text{Cl}]$  **4** in the solid state. Hydrogen atoms are omitted for clarity. Atomic displacement ellipsoids are set at 50 % probability (the disordered part of the cyclopentadienyl ring is also depicted). Selected bond lengths [Å] and angles [°] for **4**: Cr–C1 2.1072(19), Cr–Cl1 2.2915(7), Cr–Cp<sub>Centroid</sub> 2.0027(5), C1–Cr–Cl1 95.79(6), C1–Cr–Cp<sub>Centroid</sub> 131.245(57), Cl1–Cr–Cp<sub>Centroid</sub> 132.893(24).

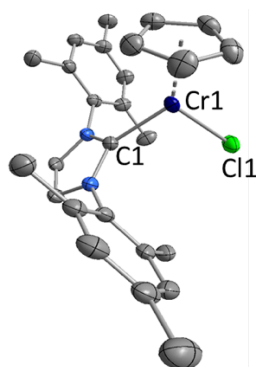

**Figure S5:** The molecular structure of  $[(\eta^5\text{-C}_5\text{H}_5)\text{Cr}(\text{IMes})\text{Cl}]$  **5** in the solid state. Hydrogen atoms are omitted for clarity. Atomic displacement ellipsoids are set at 50 % probability. Selected bond lengths [Å] and angles [°] for **5**: Cr–C1 2.1096(18), Cr–Cl1 2.2988(9), Cr–Cp<sub>Centroid</sub> 1.98671(6), C1–Cr–Cl1 98.70(5), C1–Cr–Cp<sub>Centroid</sub> 133.283(53), Cl1–Cr–Cp<sub>Centroid</sub> 128.014(36).

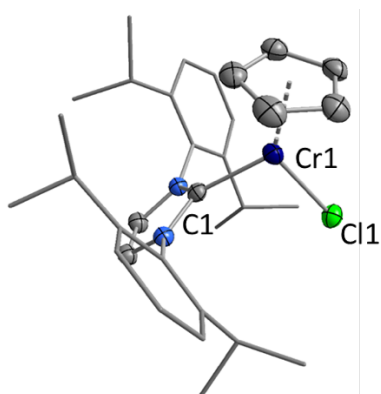

**Figure S6:** The molecular structure of  $[(\eta^5\text{-C}_5\text{H}_5)\text{Cr}(\text{IDipp})\text{Cl}]$  **6** in the solid state. Hydrogen atoms are omitted for clarity. Atomic displacement ellipsoids are set at 50 % probability (the diisopropylphenyl-groups are represented in wire-stick model). Selected bond lengths [Å] and angles [°] for **5**: Cr–C1 2.1014(14), Cr–Cl1 2.3076(5), Cr–Cp<sub>Centroid</sub> 1.9867(3), C1–Cr–Cl1 94.83(4), C1–Cr–Cp<sub>Centroid</sub> 132.358(41), Cl1–Cr–Cp<sub>Centroid</sub> 132.718(17).

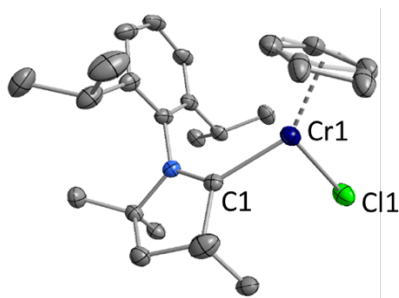

**Figure S7:** Molecular structure of  $[(\eta^5\text{-C}_5\text{H}_5)\text{Cr}(\text{cAAC}^{\text{Me}})\text{Cl}]$  **7** in the solid state. Hydrogen atoms are omitted for clarity. Atomic displacement ellipsoids are set at 50 % probability (the disordered part of the cyclopentadienyl-ring is also shown in wirestick model representation). Selected bond lengths [ $\text{\AA}$ ] and angles [ $^\circ$ ] for **7**: Cr–C1 2.1332(33), Cr–Cl1 2.299(1), Cr–Cp<sub>Centroid</sub> 1.9576(5), C1–Cr–Cl1 97.38(8), C1–Cr–Cp<sub>Centroid</sub> 140.286(91), Cl1–Cr–Cp<sub>Centroid</sub> 122.275(33).

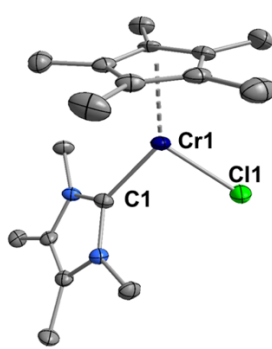

**Figure S8:** Molecular structure of  $[(\eta^5\text{-C}_5\text{Me}_5)\text{Cr}(\text{IMe}^{\text{Me}})\text{Cl}]$  **10** in the solid state. Hydrogen atoms are omitted for clarity. Atomic displacement ellipsoids are set at 50 % probability. Selected bond lengths [ $\text{\AA}$ ] and angles [ $^\circ$ ] for **10**: Cr1–C1 2.1204(33), Cr1–Cl1 2.3162(12), Cr1–Cp\*<sub>Centroid</sub> 1.9637(6), C1–Cr1–Cl1 97.81(10), C1–Cr1–Cp\*<sub>Centroid</sub> 135.764(91), Cp\*<sub>Centroid</sub>–Cr1–Cl1 126.213(37).

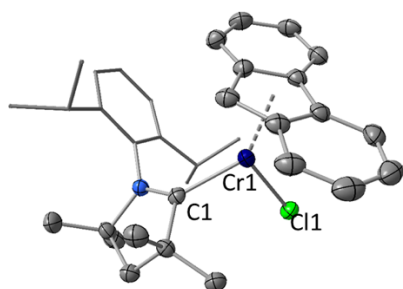

**Figure S9:** Molecular structure of  $[(\eta^5\text{-C}_{13}\text{H}_9)\text{Cr}(\text{cAAC}^{\text{Me}})\text{Cl}]$  **8** in the solid state. Hydrogen atoms are omitted for clarity. Atomic displacement ellipsoids are set at 50 % probability (the *dis*isopropylphenyl-group is represented in wire-stick model). Selected bond lengths [ $\text{\AA}$ ] and angles [ $^\circ$ ] for **8**: Cr–C1 2.0933(32), Cr–Cl1 2.3122(7), Cr–Fl<sub>Centroid</sub> 2.0243(5), C1–Cr–Cl1 98.29(6), C1–Cr–Fl<sub>Centroid</sub> 131.799(69), Cl1–Cr–Fl<sub>Centroid</sub> 129.072(25).

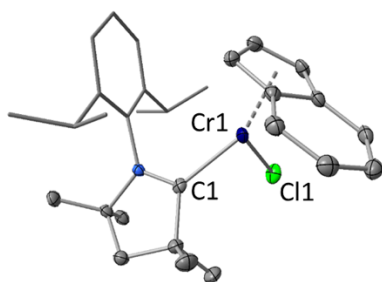

**Figure S10:** Molecular structure of  $[(\eta^5\text{-C}_8\text{H}_7)\text{Cr}(\text{cAAC}^{\text{Me}})\text{Cl}]$  **9** in the solid state. Hydrogen atoms are omitted for clarity. Atomic displacement ellipsoids are set at 50 % probability (the diisopropylphenyl-group is represented in wire-stick model). Selected bond lengths [Å] and angles [°] for **9**: Cr–C1 2.1311(17), Cr–Cl1 2.2994(4), Cr–Ind<sub>Centroid</sub> 2.0075(3), C1–Cr–Cl1 93.12(4), C1–Cr–Ind<sub>Centroid</sub> 140.811(45), Cl1–Cr–Ind<sub>Centroid</sub> 125.863(17).

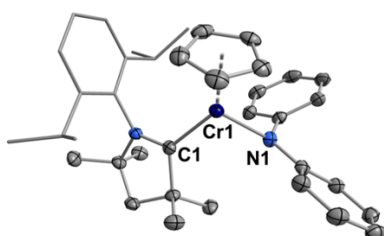

**Figure S11:** Molecular structure of  $[(\eta^5\text{-C}_5\text{Me}_5)\text{Cr}(\text{IME})(\text{CO})_2]$  **11** in the solid state. Hydrogen atoms are omitted for clarity (the diisopropylphenyl-group is represented in wire-stick model). Atomic displacement ellipsoids are set at 50 % probability. Selected bond lengths [Å] and angles [°] for **11**: Cr1–C1 2.1329(14), Cr1–C<sub>5</sub>H<sub>5</sub> Centroid 2.0056(2), Cr1–N1 2.0270(13), C1–Cr1–N1 97.76(5), C1–Cr1–C<sub>5</sub>H<sub>5</sub> Centroid 140.586(44), N1–Cr1–C<sub>5</sub>H<sub>5</sub> Centroid 121.419(38).

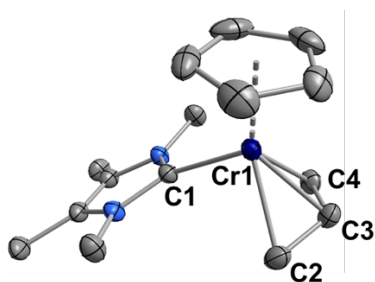

**Figure S12:** Molecular structure of  $[(\eta^5\text{-C}_5\text{H}_5)\text{Cr}(\text{IME}^{\text{Me}})(\eta^3\text{-C}_3\text{H}_5)]$  **12** in the solid state. Hydrogen atoms are omitted for clarity. Atomic displacement ellipsoids are set at 50 % probability. Selected bond lengths [Å] and angles [°] for **12**: Cr1–C1 2.0834(17), Cr1–C2 2.1240(21), Cr1–C3 2.03080(22), Cr1–C4 2.1342(17), Cr–Cp<sub>Centroid</sub> 1.8707(4), C2–C3 1.4326(26), C3–C4 1.4329(27), C1–Cr1–C2 92.93(7), C1–Cr1–C3 114.06(7), C1–Cr1–C4 93.35(7), C1–Cr1–Cp<sub>Centroid</sub> 121.952(49), C2–Cr1–Cp<sub>Centroid</sub> 130.455(56), C3–Cr1–Cp<sub>Centroid</sub> 123.967(58), C4–Cr1–Cp<sub>Centroid</sub> 132.197(52).

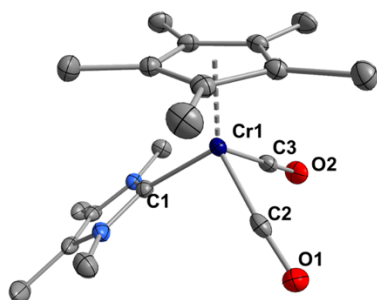

**Figure S13:** Molecular structure of  $[(\eta^5\text{-C}_5\text{Me}_5)\text{Cr}(\text{IMe})(\text{CO})_2]$  **13** in the solid state. Hydrogen atoms are omitted for clarity. Atomic displacement ellipsoids are set at 50 % probability. Selected bond lengths [Å] and angles [°] for **13**: Cr1–C1 2.0767(19), Cr1–C<sub>5</sub>Me<sub>5</sub> Centroid 1.8599(3), Cr1–C2 1.8298(14), Cr1–C3 1.8268(17), C2–O1 1.1697(17), C3–O2 1.1686(20), C1–Cr1–C2 97.41(6), C1–Cr1–C3 95.92(6), C1–Cr1–C<sub>5</sub>Me<sub>5</sub> Centroid 124.408(49), C2–Cr1–C3 97.46(7), C2–Cr1–C<sub>5</sub>Me<sub>5</sub> Centroid 123.853(57), C3–Cr1–C<sub>5</sub>Me<sub>5</sub> Centroid 124.485(57).

The attempts to isolate  $[\{\text{Cr}(\text{IMe}^{\text{Me}})(\text{THF})\text{Cl}(\mu\text{-Cl})\}_2]$ , which in principle defied isolation, lead to formation of small amounts of a number of single crystals suitable for X-ray diffraction. The resulting molecular structures crystal structures reveal that the situation here is more complicated as different isomers have been characterized by X-ray crystallography, which consists of isolated molecules  $[\{\text{Cr}(\text{IMe}^{\text{Me}})(\text{THF})\text{Cl}(\mu\text{-Cl})\}_2]$  (Figure S14), one dimensional strands of  $[\{\text{Cr}(\text{IMe}^{\text{Me}})\text{Cl}(\mu\text{-Cl})\}_2]$  and  $[\text{Cr}(\text{THF})_2\text{Cl}_2]$ , in which each  $[\{\text{Cr}(\text{IMe}^{\text{Me}})\text{Cl}(\mu\text{-Cl})\}_2]$  molecule is bridged by two  $\mu$ -chloride ligands of  $[\text{Cr}(\text{THF})_2\text{Cl}_2]$ , i.e.,  $\infty[\{\text{Cr}(\text{IMe}^{\text{Me}})\text{Cl}(\mu\text{-Cl})\}_2][\text{Cr}(\text{THF})_2(\mu\text{-Cl})_2]$  (Figure S15) or a mixture thereof (Figure S16).

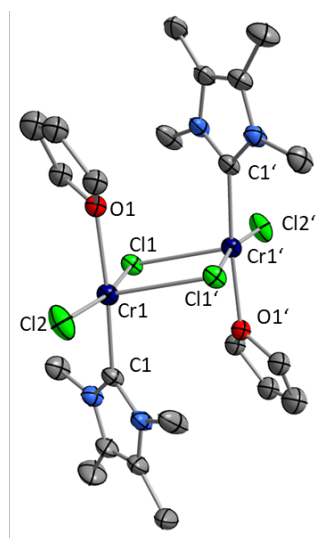

**Figure S14:** The molecular structure of  $[\{\text{Cr}(\text{IMe}^{\text{Me}})(\text{THF})\text{Cl}(\mu\text{-Cl})\}_2]$  in the solid state. Hydrogen atoms are omitted for clarity. Atomic displacement ellipsoids are set at 50 % probability. Selected bond lengths [Å] and angles [°]: Cr1–C1 2.1377(37), Cr1–O1 2.1636(58), Cr1–Cl1 2.3960(8), Cr1–Cl2 2.3546(10), Cr1–Cl1' 2.6816(10), C1–Cr1–O1 171.72(15), Cl1–Cr1–Cl2 169.19(4), Cl1–Cr1–Cl1' 89.41(3), Cl1–Cr1'–Cl2' 100.21(3).

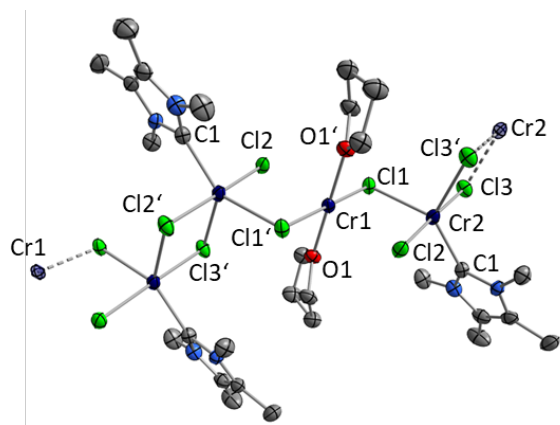

**Figure S15:** The molecular structure of  $^1_{\infty}[\{\text{Cr}(\text{IME}^{\text{Me}})\text{Cl}(\mu\text{-Cl})\}_2][\text{Cr}(\text{THF})_2(\mu\text{-Cl})_2]$  in the solid state. Hydrogen atoms are omitted for clarity. Atomic displacement ellipsoids are set at 50 % probability. Selected bond lengths [Å] and angles [°]: Cr1–O1/O1' 2.0673(28), Cr–Cl1/Cl1' 2.4093(8), Cr2–Cl2 2.3746(9), Cr2–Cl3 2.3899(9), Cr2–Cl3' 2.5361(11), O1–Cr1–O1' 180.000, Cl1–Cr1–Cl1' 180.000, Cr1–Cl1–Cr2 93.30(3), Cl1–Cr2–Cl1 1134.08(9), Cl1–Cr2–Cl3 89.79(3), Cl1–Cr–Cl3' 100.68(3), Cl1–Cr2–Cl2 93.13(9), Cr1–Cr2–Cl3 86.08(9), Cl1–Cr2–Cl3' 124.88(9), Cr1–Cl3/Cl3'–Cr2 91.15(3).

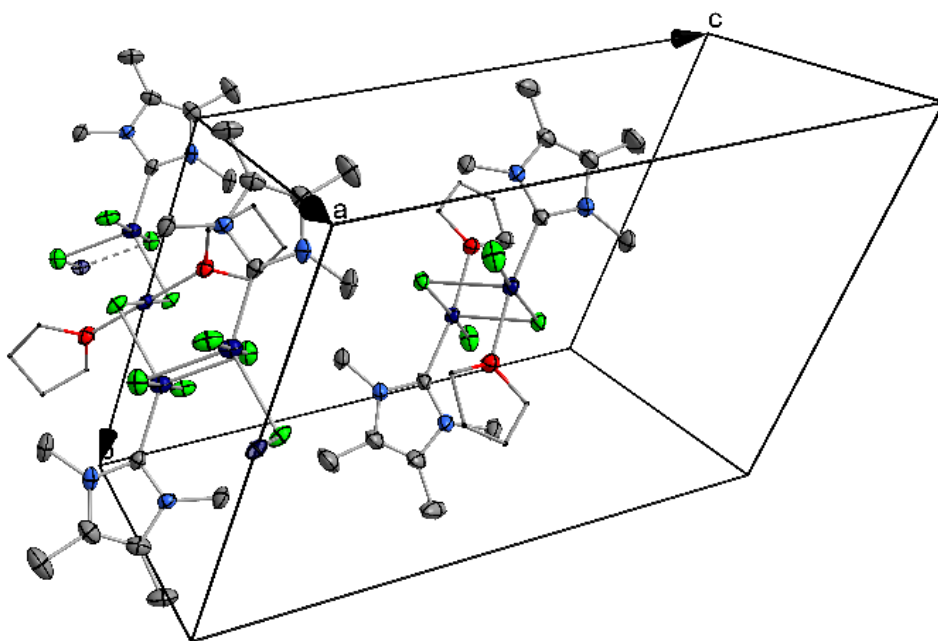

**Figure S16:** The molecular structure of “[Cr(IME<sup>Me</sup>)(THF)Cl<sub>2</sub>]” in the solid state.

### 3. High Resolution Mass Spectrometry Data

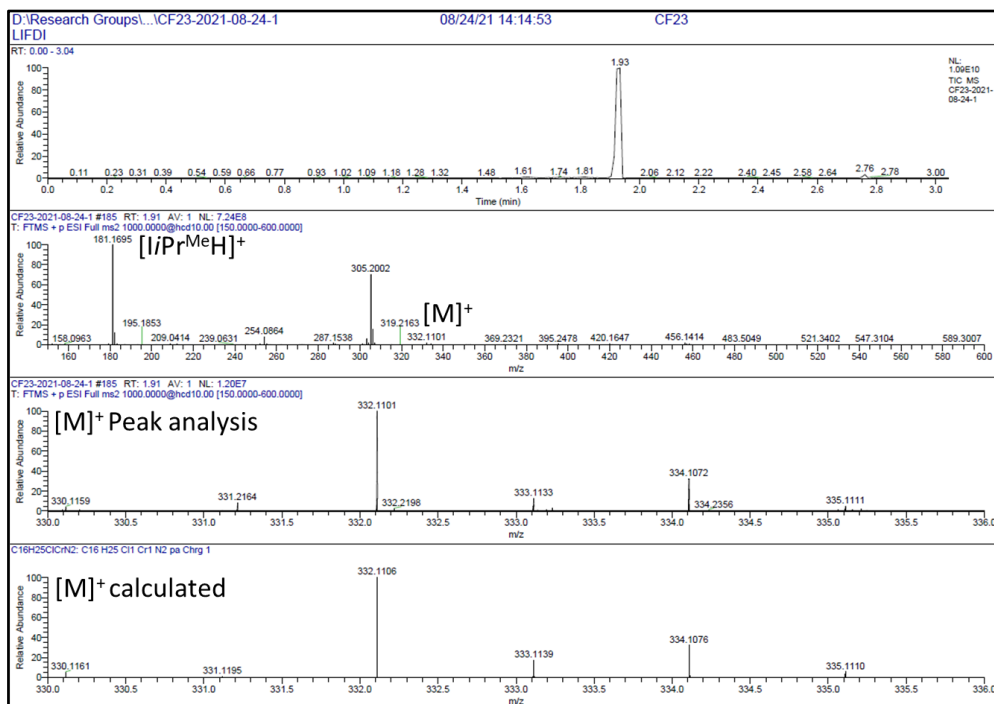

Figure S17: Mass spectrometric data obtained for  $[(\eta^5\text{-C}_5\text{H}_5)\text{Cr}(\text{LiPr}^{\text{Me}})\text{Cl}]$  **4**.

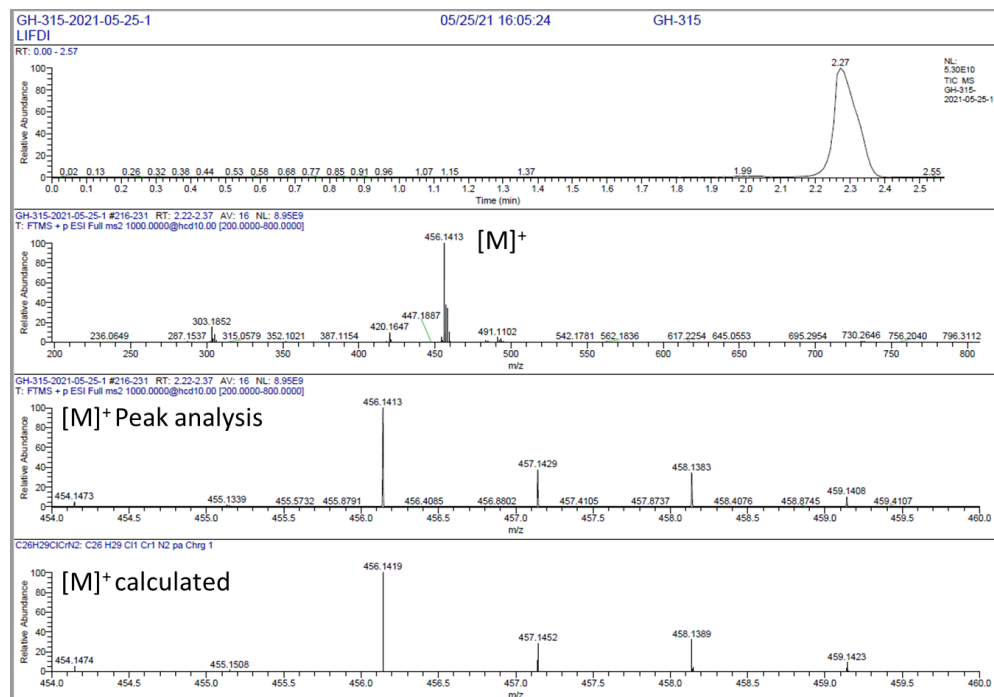

Figure S18: Mass spectrometric data obtained for  $[(\eta^5\text{-C}_5\text{H}_5)\text{Cr}(\text{IMes})\text{Cl}]$  **5**.

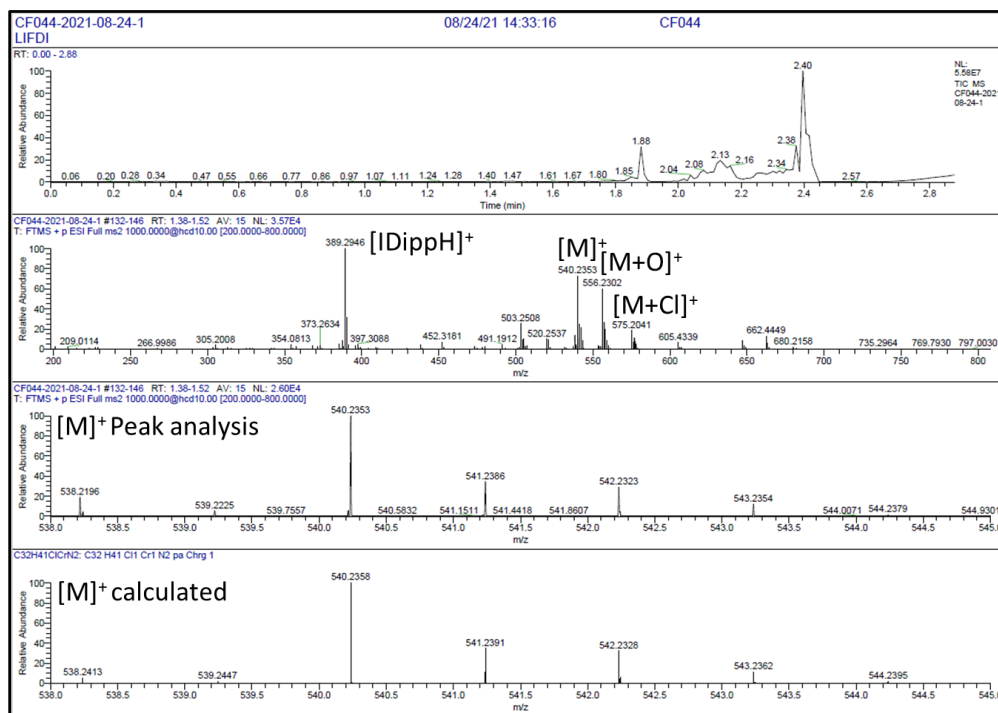

**Figure S19:** Mass spectrometric data obtained for  $[(\eta^5\text{-C}_5\text{H}_5)\text{Cr}(\text{IDipp})\text{Cl}]$  **6**. Due to its high sensitivity towards ambient air and moisture, additional peaks were observed and assigned to the oxidation products  $[(\eta^5\text{-C}_5\text{H}_5)\text{Cr}(\text{O})(\text{IDipp})\text{Cl}]$  ( $m/z = 556.2302$ ) and  $[(\eta^5\text{-C}_5\text{H}_5)\text{Cr}(\text{IDipp})\text{Cl}_2]$  ( $m/z = 575.2041$ ) as well as the protonated ligand  $\text{IDippH}^+$  ( $m/z = 389.2946$ ).

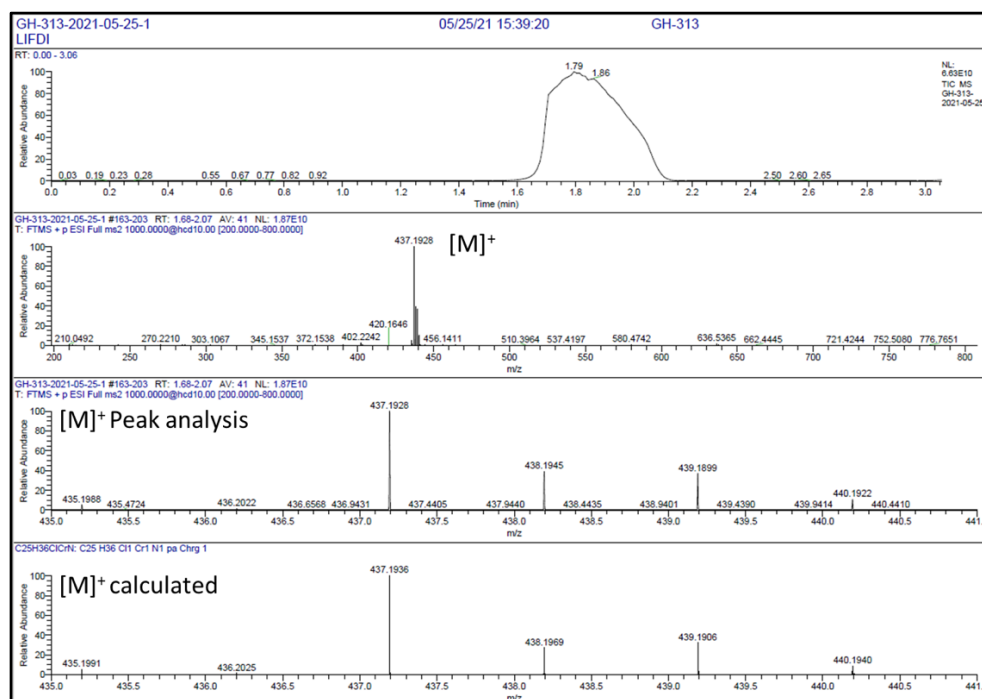

**Figure S20:** Mass spectrometric data obtained for  $[(\eta^5\text{-C}_5\text{H}_5)\text{Cr}(\text{cAAC}^{\text{Me}})\text{Cl}]$  **7**.

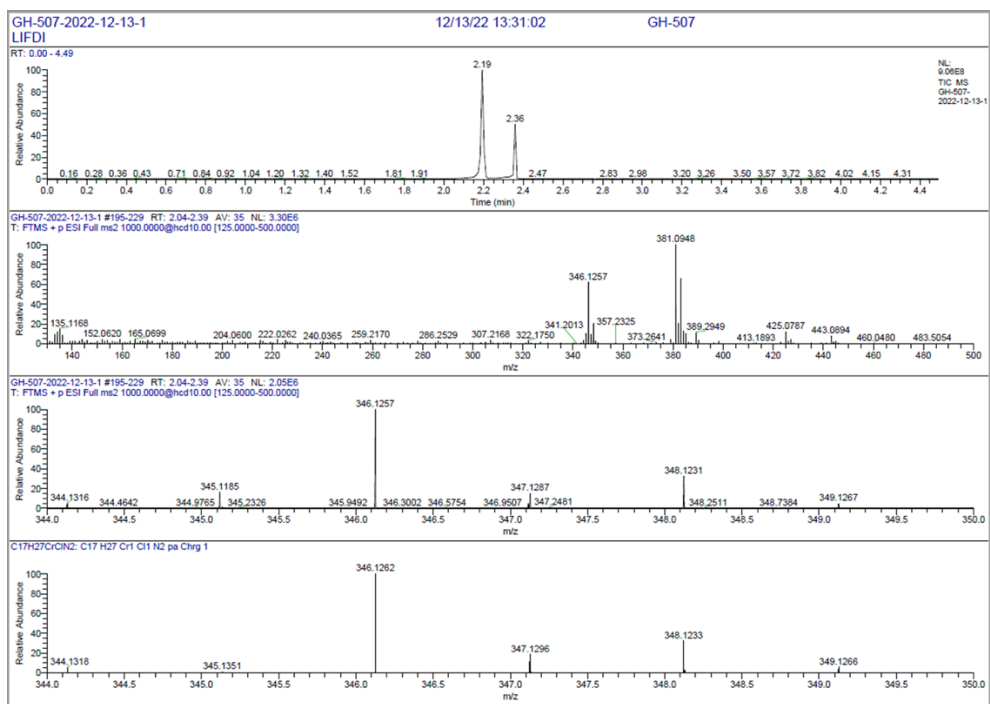

Figure S21: Mass spectrometric data obtained for  $[(\eta^5\text{-C}_5\text{Me}_5)\text{Cr}(\text{IMe}^{\text{Me}})]$  **8**

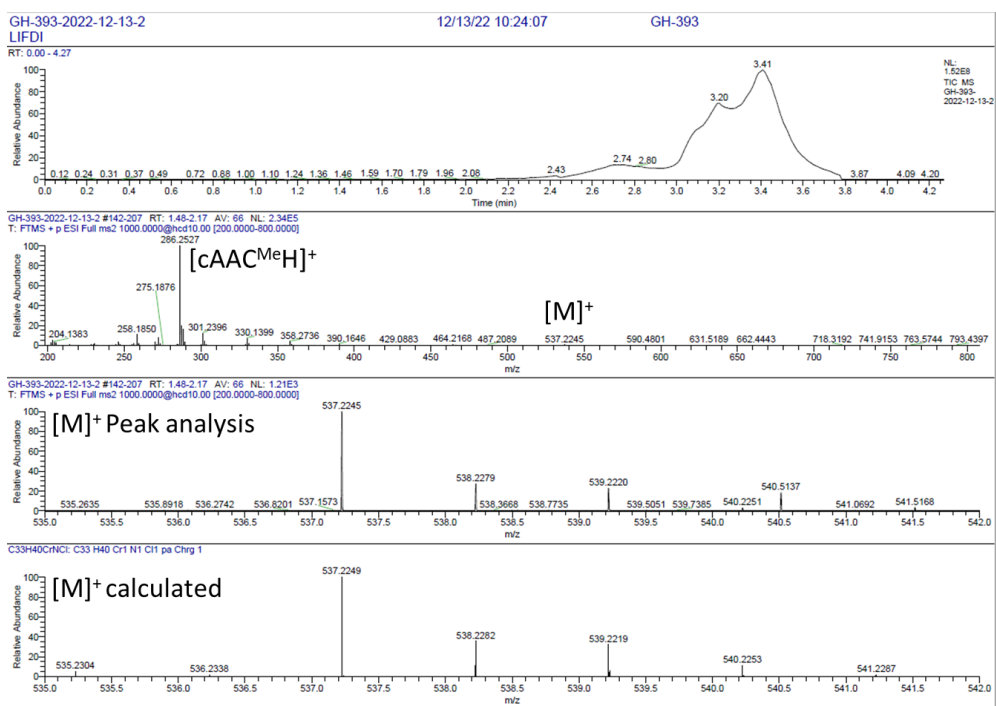

Figure S22: Mass spectrometric data obtained for  $[(\eta^5\text{-C}_{13}\text{H}_9)\text{Cr}(\text{cAAC}^{\text{Me}})\text{Cl}]$  **9**.



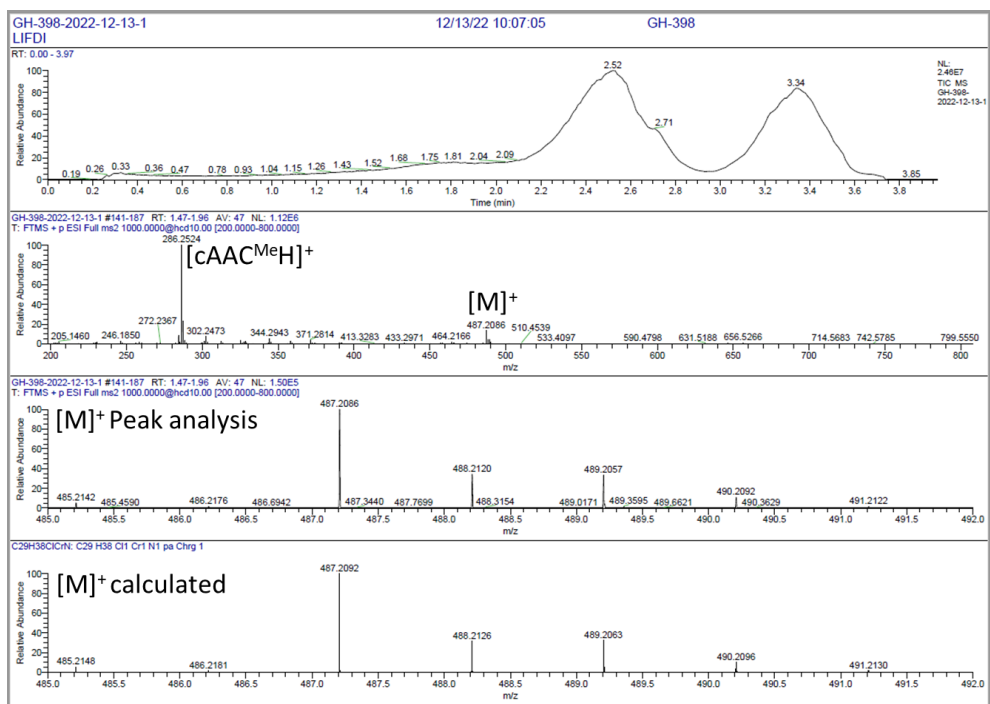

Figure S23: Mass spectrometric data obtained for  $[(\eta^5\text{-C}_9\text{H}_7)\text{Cr}(\text{cAAC}^{\text{Me}})\text{Cl}]$  **10**.

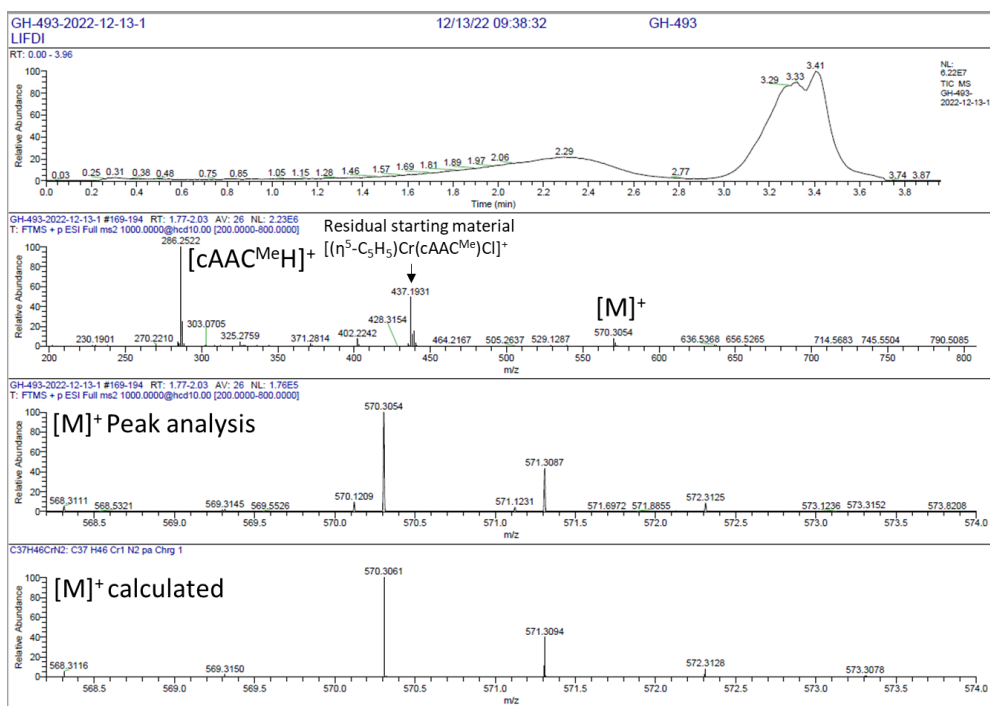

Figure S24: Mass spectrometric data obtained for  $[(\eta^5\text{-C}_5\text{H}_5)\text{Cr}(\text{cAAC}^{\text{Me}})(\text{NPh}_2)]$  **11**.

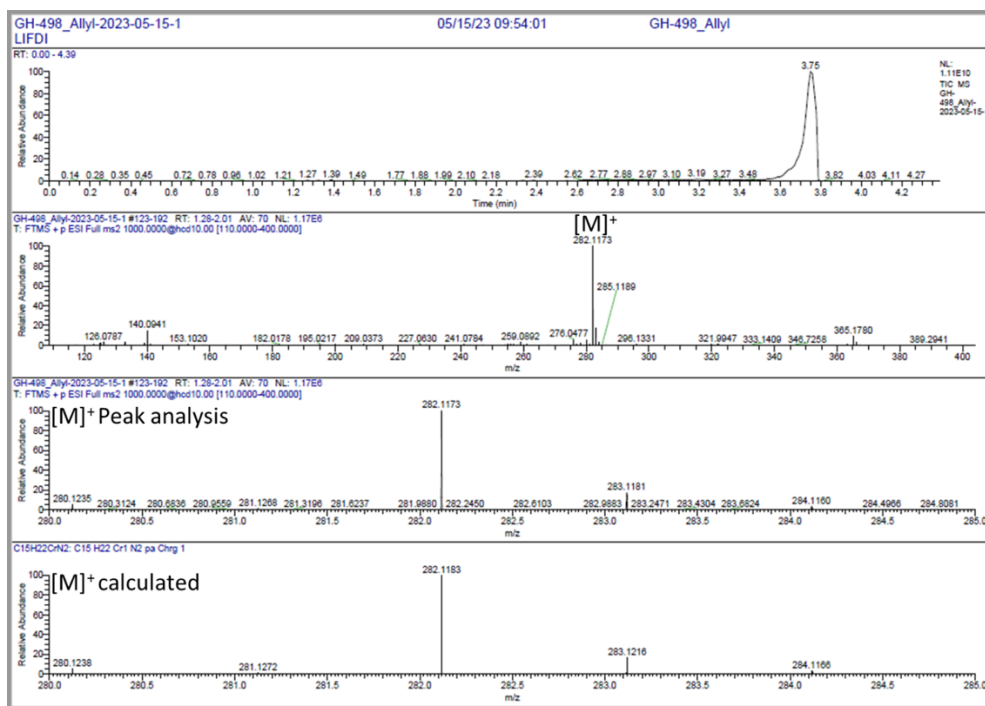

Figure S25: Mass spectrometric Data obtained for  $[(\eta^5\text{-C}_5\text{H}_5)\text{Cr}(\text{IME}^{\text{Me}})(\eta^5\text{-C}_3\text{H}_5)]$  **12**.

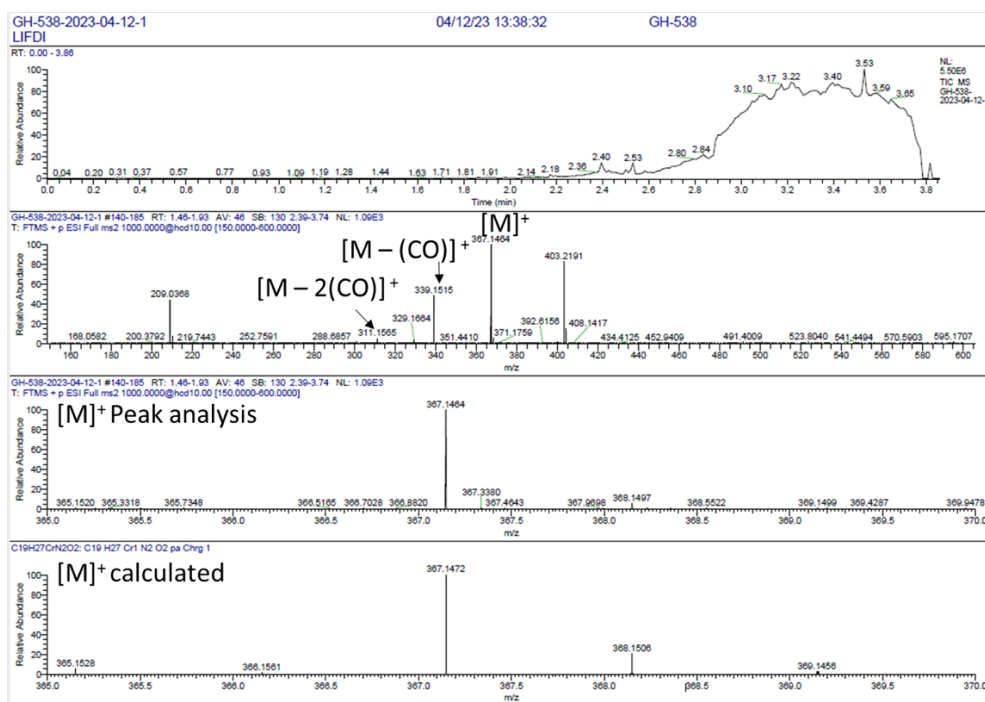

Figure S26: Mass spectrometric Data obtained for  $[(\eta^5\text{-C}_5\text{Me}_5)\text{Cr}(\text{IME}^{\text{Me}})(\text{CO})_2]$  **13**.

#### 4. IR-Spectrum of $[(\eta^5\text{-C}_5\text{Me}_5)\text{Cr}(\text{IMe}^{\text{Me}})(\text{CO})_2]$ **13**

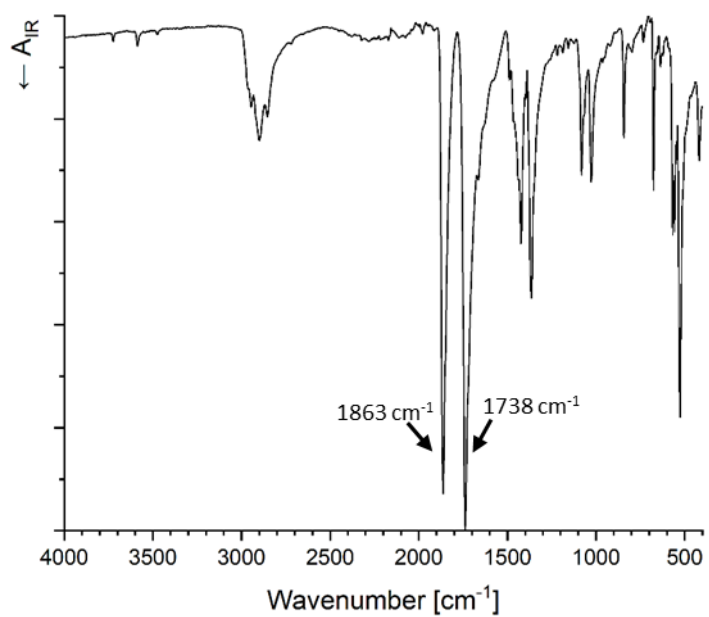

**Figure S27:** IR spectrum obtained for  $[(\eta^5\text{-C}_5\text{Me}_5)\text{Cr}(\text{CO})_2(\text{IMe}^{\text{Me}})]$  **13**. The bands at 1738 cm<sup>-1</sup> and 1863 cm<sup>-1</sup> can be assigned to the  $\nu_{\text{CO symm}}$  and  $\nu_{\text{CO asymm}}$  stretching modes of CO.

## 5. UV-Vis Spectra of Compounds

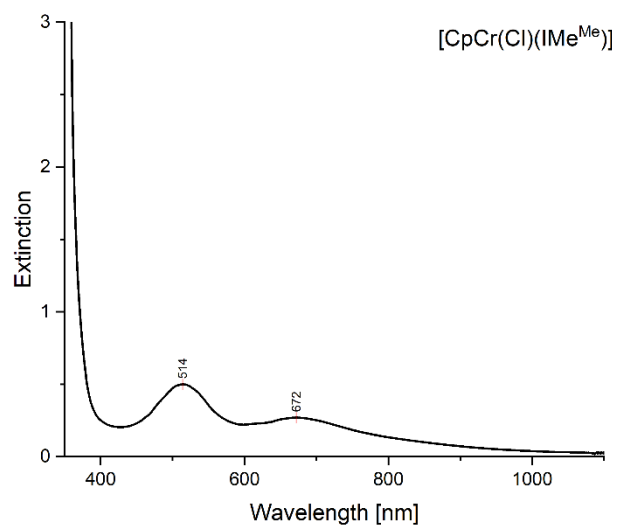

**Figure S28:** UV-Vis spectrum of  $[(\eta^5\text{-C}_5\text{H}_5)\text{Cr}(\text{IMe}^{\text{Me}})\text{Cl}]$  **3** in toluene. Molar extinction coefficients of **3**: 514 nm ( $\epsilon = 105 \text{ L mol}^{-1} \text{ cm}^{-1}$ ), 672 nm ( $\epsilon = 55 \text{ L mol}^{-1} \text{ cm}^{-1}$ ).

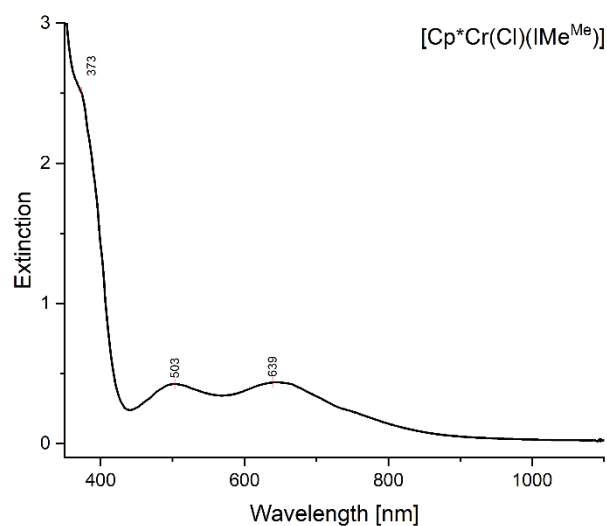

**Figure S29:** UV-Vis spectrum of  $[(\eta^5\text{-C}_5\text{Me}_5)\text{Cr}(\text{IMe}^{\text{Me}})\text{Cl}]$  **8** in toluene. Molar extinction coefficients of **8**: 373 ( $\epsilon = 667 \text{ L mol}^{-1} \text{ cm}^{-1}$ ), 503 ( $\epsilon = 126 \text{ L mol}^{-1} \text{ cm}^{-1}$ ), 639 ( $\epsilon = 122 \text{ L mol}^{-1} \text{ cm}^{-1}$ ).

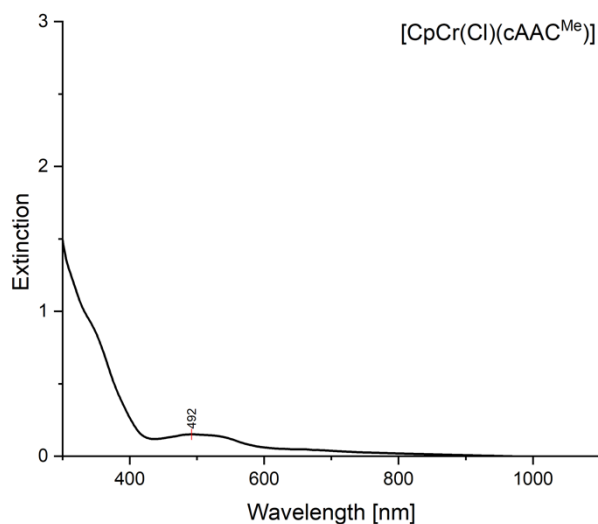

**Figure S30:** UV-Vis spectrum of  $[(\eta^5\text{-C}_5\text{H}_5)\text{Cr}(\text{cAAC}^{\text{Me}})\text{Cl}]$  **7** in toluene. Molar extinction coefficients of **7**: 492 nm ( $\epsilon = 248 \text{ L mol}^{-1} \text{ cm}^{-1}$ ).

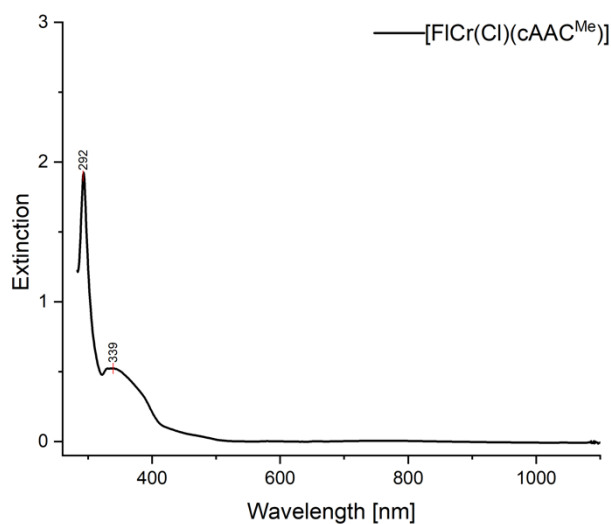

**Figure S31:** UV-Vis spectrum of  $[(\eta^5\text{-C}_{13}\text{H}_9)\text{Cr}(\text{cAAC}^{\text{Me}})\text{Cl}]$  **9** in toluene. Molar extinction coefficients of **9**: 292 nm ( $\epsilon = 7603 \text{ L mol}^{-1} \text{ cm}^{-1}$ ), 339 nm ( $\epsilon = 2600 \text{ L mol}^{-1} \text{ cm}^{-1}$ ), 745 nm ( $\epsilon = 166 \text{ L mol}^{-1} \text{ cm}^{-1}$ ).

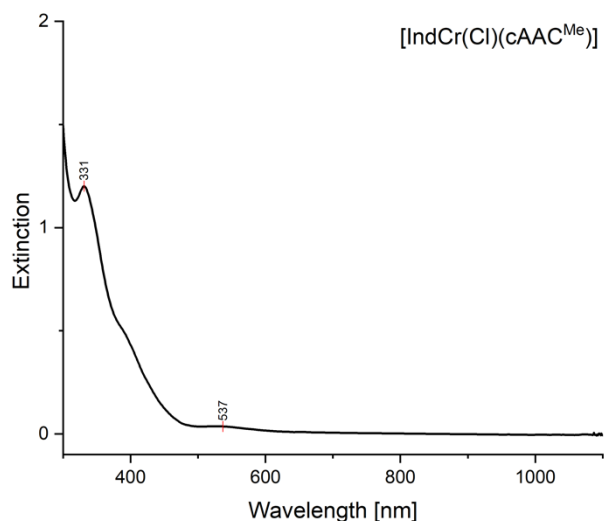

**Figure S32:** UV-Vis spectrum of  $[(\eta^5\text{-C}_9\text{H}_7)\text{Cr}(\text{cAAC}^{\text{Me}})\text{Cl}]$  **10** in toluene. Molar extinction coefficients of **10**: 331 nm ( $\epsilon = 3881 \text{ L mol}^{-1} \text{ cm}^{-1}$ ), 537 nm ( $\epsilon = 168 \text{ L mol}^{-1} \text{ cm}^{-1}$ ).

## 5. Computational Details – Optimized Geometries

### General Considerations

Calculations have been performed using the TURBOMOLE V7.2 program suite, a development of University of Karlsruhe and the Forschungszentrum Karlsruhe GmbH, 1989-2007, TURBOMOLE GmbH, since 2007; available from <http://www.turbomole.com>.<sup>[3]</sup> Geometry optimizations were performed using (RI-)DFT calculations<sup>[4]</sup> on a m4 grid employing the BP86<sup>[5]</sup> functional and a def2-TZVP basis set for chromium and for all other atoms the def2-SVP basis sets.<sup>[6]</sup> Vibrational frequencies were calculated at the same level with the AOFORCE<sup>[7]</sup> module and the optimized structure represents a true minimum without imaginary frequencies.

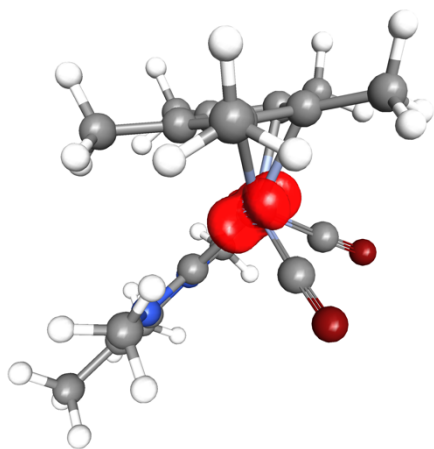

**Figure S33:** Spin-density of  $[(\eta^5\text{-C}_5\text{Me}_5)\text{Cr}(\text{IMe}^{\text{Me}})(\text{CO})_2]$  **13** at the DFT/def2-SVP,def2-TZVP(Cr)/BP86 level of theory.

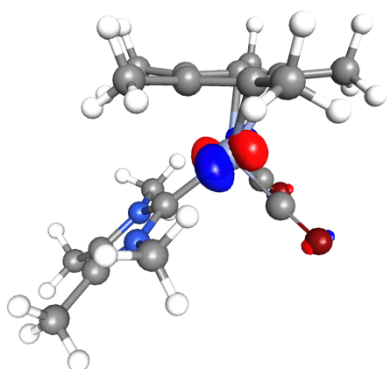

**Figure S34:** Calculated SOMO of  $[(\eta^5\text{-C}_5\text{Me}_5)\text{Cr}(\text{IMe}^{\text{Me}})(\text{CO})_2]$  **13** at the DFT/def2-SVP,def2-TZVP(Cr)/BP86 level of theory.

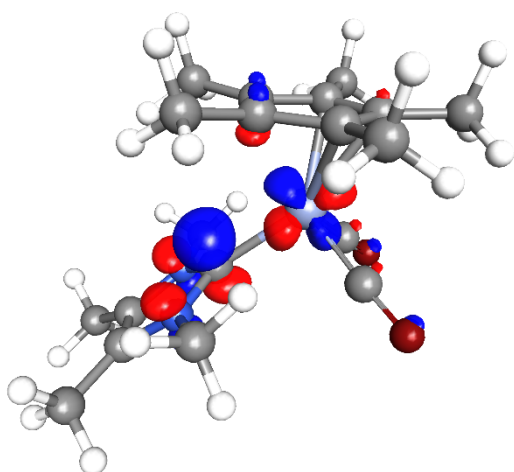

**Figure S35:** Calculated LUMO of  $[(\eta^5\text{-C}_5\text{Me}_5)\text{Cr}(\text{IMe}^{\text{Me}})(\text{CO})_2]$  **13** at the DFT/def2-SVP,def2-TZVP(Cr)/BP86 level of theory.

### Cartesian coordinates of the optimized complex $[(\eta^5\text{-C}_5\text{Me}_5)\text{Cr}(\text{IMe}^{\text{Me}})(\text{CO})_2]$ **13**

Energy = -2044.166647395

|    |            |           |           |
|----|------------|-----------|-----------|
| C  | 2.7490976  | 3.8520007 | 6.0874196 |
| N  | 3.6096341  | 2.7881859 | 6.2635443 |
| N  | 3.3654682  | 4.5918907 | 5.0994175 |
| Cr | 1.0005429  | 4.2579536 | 7.0852213 |
| C  | 4.7380732  | 2.8751959 | 5.4345935 |
| C  | 3.4116369  | 1.7296808 | 7.2398690 |
| C  | 4.5824102  | 4.0245806 | 4.6925076 |
| C  | 2.8539394  | 5.8494575 | 4.5798516 |
| C  | 1.4069531  | 5.9823119 | 7.4992540 |
| C  | 1.6789131  | 4.0379287 | 8.7582059 |
| C  | -0.2583699 | 2.6369631 | 6.1444316 |
| C  | -0.4472554 | 3.8550683 | 5.3969633 |
| C  | -0.9899297 | 4.8461420 | 6.2883265 |
| C  | -1.1403984 | 4.2425380 | 7.5924235 |

|   |            |           |           |
|---|------------|-----------|-----------|
| C | -0.6847899 | 2.8734766 | 7.4989263 |
| C | 5.8300048  | 1.8563281 | 5.4405693 |
| C | 5.4529364  | 4.6370623 | 3.6450700 |
| O | 1.6327624  | 7.0984718 | 7.8135066 |
| O | 2.0744914  | 3.9277455 | 9.8658946 |
| C | 0.1814419  | 1.3240954 | 5.5579968 |
| C | -0.2313731 | 4.0018881 | 3.9163621 |
| C | -1.4578823 | 6.2239579 | 5.9052514 |
| C | -1.7810645 | 4.8806736 | 8.7940960 |
| C | -0.7861044 | 1.8443310 | 8.5920584 |
| H | 0.5303775  | 0.6177236 | 6.3363199 |
| H | -0.6574222 | 0.8243331 | 5.0234694 |
| H | 1.0032660  | 1.4498558 | 4.8245736 |
| H | 0.6870729  | 3.4825021 | 3.5756863 |
| H | -1.0809482 | 3.5666866 | 3.3435018 |
| H | -0.1506558 | 5.0636103 | 3.6118043 |
| H | -0.9069673 | 6.6211091 | 5.0297140 |
| H | -2.5378790 | 6.2179464 | 5.6381227 |
| H | -1.3246732 | 6.9489128 | 6.7314022 |
| H | -1.6146988 | 5.9755003 | 8.8132316 |
| H | -2.8815707 | 4.7120587 | 8.8064734 |
| H | -1.3738526 | 4.4730612 | 9.7399645 |
| H | -0.6001513 | 2.2841689 | 9.5910507 |
| H | -1.7989188 | 1.3842480 | 8.6141165 |
| H | -0.0573728 | 1.0206948 | 8.4559670 |
| H | 4.1188850  | 1.8278122 | 8.0890780 |
| H | 2.3832205  | 1.8196009 | 7.6324521 |
| H | 3.5448409  | 0.7341305 | 6.7718486 |
| H | 6.2998509  | 1.7528757 | 6.4419182 |
| H | 5.4678411  | 0.8479486 | 5.1446402 |
| H | 6.6276270  | 2.1413173 | 4.7286801 |
| H | 6.3703652  | 4.0347214 | 3.5055454 |
| H | 4.9453004  | 4.6997547 | 2.6581393 |
| H | 5.7694167  | 5.6673228 | 3.9144379 |
| H | 2.8459186  | 5.8423493 | 3.4717881 |
| H | 1.8234163  | 5.9767191 | 4.9563412 |
| H | 3.4626738  | 6.7076089 | 4.9317741 |



## 6. References

- [1] G. M. Sheldrick, *Acta Crystallogr A Found Adv* **2015**, 71, 3-8.
- [2] a) W. T. Pennington, *Journal of Applied Crystallography* **1999**, 32, 1028-1029; b) Crystal Impact – Dr. H. Putz & Dr. K. Brandenburg GbR, Kreuzherrenstr. 102, 53227 Bonn, Germany, <https://www.crystalimpact.de/diamond>.
- [3] a) F. Furche, R. Ahlrichs, C. Hättig, W. Klopper, M. Sierka, F. T. Weigend, *Mol. Sci.* 2014, **4**, 91-100; b) R. Ahlrichs, M. Bär, M. Häser, H. Horn, C. Kölmel, *Chem. Phys. Lett.* 1989, **162**, 165-169.
- [4] a) O. Treutler, R. Ahlrichs, *J. Chem. Phys.* 1995, **102**, 346-354; b) M. Häser, R. Ahlrichs, *J. Comp. Chem.* 1989, **10**, 104-111.
- [5] a) A. D. Becke, *Phys. Rev. A* **1988**, 38, 3098-3100; b) J. P. Perdew, *Phys. Rev. B* **1986**, 33, 8822-8824; *erratum*: J. P. Perdew, *Phys. Rev. B* **1986**, 34, 7406.
- [6] a) A. Schäfer, H. Horn, R. Ahlrichs, *J. Chem. Phys.* 1992, **97**, 2571-2577; b) A. Schäfer, C. Huber, R. Ahlrichs, *J. Chem. Phys.* 1994, **100**, 5829-5835; c) K. Eichkorn, O. Treutler, H. Oehm, M. Häser, R. Ahlrichs, *Chem. Phys. Lett.* 1995, **242**, 652-660; d) F. Weigend, R. Ahlrichs, *Phys. Chem. Chem. Phys.* 2005, **7**, 3297-3305; e) F. Weigend, *Phys. Chem. Chem. Phys.* 2006, **8**, 1057-1065.
- [7] P. Deglmann, *Chem. Phys. Lett* 2004, **384**, 103-107.
